# Supplementary material for: Climate change impacts on the threatened terrestrial vertebrates of the Pacific Islands
Source: PubMed Central journal article supplement (PMC5509733; doi:10.1038/s41598-017-05034-4), 2017-07-13
Supplement: 41598_2017_5034_MOESM1_ESM.pdf [file 41598_2017_5034_MOESM1_ESM.pdf]

## Supplementary Information

### **Climate change impacts on the threatened terrestrial vertebrates of the Pacific Islands**

Lalit Kumar<sup>1,\*</sup>, Mahyat Shafapour Tehrany<sup>1</sup>

<sup>1</sup>Ecosystem Management, School of Environmental and Rural Science, University of New England, Armidale, NSW 2351, Australia

\* Corresponding author: lkumar@une.edu.au

**Supplementary Table 1. Islands that host six or more species.**

|    | Islands                         | Lithology             | Area (Km <sup>2</sup> ) | Island susceptibility ranking | Number of species |
|----|---------------------------------|-----------------------|-------------------------|-------------------------------|-------------------|
| 1  | Bougainville                    | Composite high island | 9318                    | L                             | 9                 |
| 2  | Buka                            | Composite high island | 936                     | VL                            | 7                 |
| 3  | Choiseul                        | Composite high island | 3400                    | L                             | 8                 |
| 4  | Guadalcanal                     | Composite high island | 5302                    | VL                            | 8                 |
| 5  | Ile des Pins (Kunie)            | Continental island    | 152                     | VL                            | 8                 |
| 6  | Kadavu                          | Volcanic high island  | 408                     | VL                            | 6                 |
| 7  | Kotomo (Koutoumo)               | Continental island    | 16                      | L                             | 6                 |
| 8  | New Caledonia (La Grande Terre) | Continental island    | 1628                    | L                             | 53                |
| 9  | New Guinea                      | Composite high island | 786000                  | VL                            | 31                |
| 10 | Ovalau                          | Volcanic high island  | 103                     | VL                            | 7                 |
| 11 | Santa Isabel                    | Composite high island | 3490                    | L                             | 6                 |
| 12 | Savai'i                         | Volcanic high island  | 1694                    | VL                            | 6                 |
| 13 | Taveuni                         | Volcanic high island  | 435                     | VL                            | 8                 |
| 14 | Vanua Levu                      | Volcanic high island  | 5534                    | VL                            | 6                 |
| 15 | Viti Levu                       | Composite high island | 10388                   | L                             | 10                |

**Supplementary Table 2. List of critically endangered and endangered species found on one island only.**

| Critically Endangered Species                                     | Island Susceptibly | Endangered Species                                                  | Island Susceptibly |
|-------------------------------------------------------------------|--------------------|---------------------------------------------------------------------|--------------------|
| <i>Aproteles bulmerae</i> *<br>(Bulmer's Fruit Bat)               | VL                 | <i>Bavayia exsuccida</i> *<br>(Sclerophyll Bavayia)                 | L                  |
| <i>Choerophryne siegfriedi</i><br>(species of frog )              | VL                 | <i>Bavayia goroensis</i> *<br>(Species of lizard)                   | L                  |
| <i>Dendrolagus pulcherrimus</i><br>(Golden-mantled Tree Kangaroo) | VL                 | <i>Bavayia ornata</i> *<br>(Ornate Bavayia)                         | L                  |
| <i>Dendrolagus scottae</i><br>(Tenkile)                           | VL                 | <i>Caledoniscincus auratus</i> *<br>(Koumac Litter Skink)           | L                  |
| <i>Dierogecko inexpectatus</i> *<br>(Key New Caledonian Gecko)    | L                  | <i>Caledoniscincus chazeaui</i> *<br>(Chazeau's Litter Skink)       | L                  |
| <i>Dierogecko kaalaensis</i> *<br>(Kaala Striped Gecko)           | L                  | <i>Caledoniscincus orestes</i> *<br>(Panié Litter Skink)            | L                  |
| <i>Dierogecko koniambo</i> *<br>(Koniambo Striped Gecko)          | L                  | <i>Caledoniscincus renevieri</i> *<br>(Renevier's Litter Skink)     | L                  |
| <i>Dierogecko nehoueensis</i> *<br>(Striped Gekko)                | L                  | <i>Celatiscincus similis</i> *<br>(Northern Pale-hipped Skink)      | L                  |
| <i>Dierogecko poumensis</i> *<br>(Poum Striped Gecko)             | L                  | <i>Dactylopsila tatei</i> *<br>(Tate's Triok)                       | VL                 |
| <i>Dierogecko thomaswhitei</i> *<br>(Taom Striped Gecko)          | L                  | <i>Dendrolagus goodfellowi</i> *<br>(Goodfellow's Tree Kangaroo)    | VL                 |
| <i>Dorcopsis atrata</i> *<br>(Black Dorcopsis)                    | VL                 | <i>Dendrolagus notatus</i> *<br>(Ifola tree-kangaroo)               | VL                 |
| <i>Eurydactylodes occidentalis</i> *<br>(Species of lizard)       | L                  | <i>Dierogecko validiclavis</i> *<br>(Bold-striped Gecko)            | L                  |
| <i>Geoscincus haraldmeieri</i> *<br>(Meier's Skink)               | L                  | <i>Echymipera davidi</i> *<br>(David's Echymipera)                  | M                  |
| <i>Leiolopisma alazon</i> #<br>(Ono-i-Lau Ground Skink)           | L                  | <i>Emoia aneityumensis</i><br>(Anatom Emo Skink)                    | VL                 |
| <i>Lioscincus vivae</i> *<br>(Species of lizard)                  | L                  | <i>Emoia campbelli</i><br>(Vitilevu Mountain Treeskink)             | L                  |
| <i>Marmorosphax kaala</i> *<br>(Species of lizard)                | L                  | <i>Eurydactylodes symmetricus</i><br>(Large-scaled chameleon gecko) | L                  |
| <i>Marmorosphax taom</i> *<br>(Species of lizard)                 | L                  | <i>Kanakysaurus viviparous</i> *<br>(Species of lizard)             | L                  |
| <i>Mirimiri acrodonta</i><br>(Fijian Monkey-faced Bat)            | VL                 | <i>Kanakysaurus zebratus</i> *<br>(Species of lizard)               | L                  |
| <i>Nannoscincus exos</i> *<br>(Northern Dwarf Skink)              | L                  | <i>Lioscincus maruia</i> *<br>(Maruia Maquis Skink)                 | L                  |
| <i>Nannoscincus hanchisteus</i> *<br>(Pindai Dwarf Skink)         | L                  | <i>Lioscincus steindachneri</i> *<br>(White-lipped Forest Skink)    | L                  |
| <i>Nannoscincus manautei</i> *                                    | L                  | <i>Melomys matambuai</i> *                                          | L                  |

|                                                                  |    |                                                             |    |
|------------------------------------------------------------------|----|-------------------------------------------------------------|----|
| (Species of lizard)                                              |    | (Manus Melomys)                                             |    |
| <i>Nyctophilus nebulosus</i> *<br>(New Caledonia Long-eared Bat) | L  | <i>Nannoscincus garrulus</i> *<br>(Species of snake)        | L  |
| <i>Oedodera marmorata</i> *<br>(Marbled Gecko)                   | L  | <i>Nannoscincus greeri</i> *<br>(Greer's Dwarf Skink)       | L  |
| <i>Petaurus abidi</i><br>(Northern Glider)                       | VL | <i>Nannoscincus humectus</i> *<br>(Forêt Plate Dwarf Skink) | L  |
| <i>Phalanger matanim</i><br>(Telefomin Cuscus)                   | VL | <i>Nannoscincus slevini</i> *<br>(Slevin's Dwarf Skink)     | L  |
| <i>Pharotis Imogene</i><br>(Thomas's Big-eared Bat)              | VL | <i>Paraleptomys rufilatus</i><br>(Northern Hydromyine)      | VL |
| <i>Pteralopex pulchra</i><br>(Montane Monkey-faced Bat)          | VL | <i>Paramelomys gressitti</i><br>(Gressitt's Paramelomys)    | VL |
| <i>Pteropus tuberculatus</i><br>(Vanikoro Flying Fox)            | VL | <i>Peroryctes broadbenti</i> *<br>(Giant Bandicoot)         | VL |
| <i>Zaglossus bartoni</i><br>(Eastern Long-beaked Echidna)        | VL | <i>Rattus vandeuseni</i><br>(Van Deusen's Rat)              | VL |
|                                                                  |    | <i>Thylogale calabyi</i><br>(Calaby's Pademelon)            | VL |
|                                                                  |    | <i>Thylogale lanatus</i> *<br>(Mountain Pademelon)          | VL |

**Supplementary Table 3. List of Endemic species found in the study area, together with their threat levels, number and susceptibility of islands on which they are found, and RCP4.5 Hs projected values (2081-2100).**

| Scientific Name                                                   | Class   | Red List Category <sup>†</sup> | Islands where these are found | RCP 4.5* |
|-------------------------------------------------------------------|---------|--------------------------------|-------------------------------|----------|
| <i>Aproteles bulmerae</i><br>(Bulmer's Fruit Bat)                 | Mammal  | CE                             | 1 VL                          | 1        |
| <i>Bavayia exsuccida</i><br>(Sclerophyll Bavayia)                 | Reptile | E                              | 1 L                           | 2        |
| <i>Bavayia goroensis</i><br>(Species of lizard)                   | Reptile | E                              | 1 L                           | 2        |
| <i>Bavayia ornate</i><br>(Ornate Bavayia)                         | Reptile | E                              | 1 L                           | 2        |
| <i>Caledoniscincus auratus</i><br>(Koumac Litter Skink)           | Reptile | E                              | 1 L                           | 2        |
| <i>Caledoniscincus chazeau</i><br>(Chazeau's Litter Skink)        | Reptile | E                              | 1 L                           | 2        |
| <i>Caledoniscincus orestes</i><br>(Panié Litter Skink)            | Reptile | E                              | 1 L                           | 2        |
| <i>Caledoniscincus renevieri</i><br>(Renevier's Litter Skink)     | Reptile | E                              | 1 L                           | 2        |
| <i>Caledoniscincus terma</i><br>(Mandjélia litter skink)          | Reptile | V                              | 1 L                           | 2        |
| <i>Celaticincus euryotis</i><br>(Southern pale-hipped skink)      | Reptile | E                              | 1 L, 1 VL                     |          |
| <i>Celaticincus similis</i><br>(Northern Pale-hipped Skink)       | Reptile | E                              | 1 L                           | 2        |
| <i>Chalinolobus neocaledonicus</i><br>(New Caledonia Wattled Bat) | Mammal  | E                              | 2 L                           |          |
| <i>Dactylopsila tatei</i><br>(Tate's Triok)                       | Mammal  | E                              | 1 VL                          | 1        |
| <i>Dendrolagus dorianus</i><br>(Doria's Tree Kangaroo)            | Mammal  | V                              | 1 VL                          | 1        |
| <i>Dendrolagus goodfellowi</i><br>(Goodfellow's Tree Kangaroo)    | Mammal  | E                              | 1 VL                          | 1        |

|                                                                                 |         |    |                               |   |
|---------------------------------------------------------------------------------|---------|----|-------------------------------|---|
| <i>Dendrolagus notatus</i><br>(Ifola tree-kangaroo)                             | Mammal  | E  | 1 VL                          | 1 |
| <i>Dendrolagus stellarum</i><br>(Seri's Tree Kangaroo)                          | Mammal  | V  | 1 VL                          | 1 |
| <i>Dierogekko inexpectatus</i><br>(Species of lizard, Key New Caledonian Gecko) | Reptile | CE | 1 L                           | 2 |
| <i>Dierogekko kaalaensis</i><br>(Kaala Striped Gecko)                           | Reptile | CE | 1 L                           | 2 |
| <i>Dierogekko koniambo</i><br>(Koniambo Striped Gecko)                          | Reptile | CE | 1 L                           | 2 |
| <i>Dierogekko nehoueensis</i><br>(Striped Gekko)                                | Reptile | CE | 1 L                           | 2 |
| <i>Dierogekko poumensis</i><br>(Poum Striped Gecko)                             | Reptile | CE | 1 L                           | 2 |
| <i>Dierogekko thomaswhitei</i><br>(Taom Striped Gecko)                          | Reptile | CE | 1 L                           | 2 |
| <i>Dierogekko validiclavis</i><br>(Bold-striped Gecko)                          | Reptile | E  | 1 L                           | 2 |
| <i>Dorcopsis atrata</i><br>(Black Dorcopsis)                                    | Mammal  | CE | 1 VL                          | 1 |
| <i>Echymipera davidi</i><br>(David's Echymipera)                                | Mammal  | E  | 1 M                           | 1 |
| <i>Emoia boettgeri</i><br>(Micronesia Forest Skink)                             | Reptile | E  | 8 VL, 15 L, 9 M, 49 H, 44 VH  |   |
| <i>Emoia erronan</i><br>(Erronan Treeskink)                                     | Reptile | V  | 1 M, 1 VL                     |   |
| <i>Emoia loyaltiensis</i><br>(Loyalty Islands Emoia)                            | Reptile | V  | 4 M, 3 L                      |   |
| <i>Emoia mokosariniveikau</i><br>(Vanualevu Slender Treeskink)                  | Reptile | E  | 1 L, 3 VL                     |   |
| <i>Emoia parkeri</i><br>(Viti Copper-headed Skink)                              | Reptile | V  | 5 VL, 3 L, 2 M                |   |
| <i>Emoia tuitarere</i><br>(species of lizard)                                   | Reptile | V  | 33 H, 14 L, 57 M, 3 VH, 20 VL |   |
| <i>Eurydactylodes occidentalis</i><br>(Species of lizard)                       | Reptile | CE | 1 L                           | 2 |
| <i>Geoscincus haraldmeieri</i><br>(Meier's Skink)                               | Reptile | CE | 1 L                           | 2 |
| <i>Graciliscincus shonae</i>                                                    | Reptile | V  | 1 L, 1 VL                     |   |

|                                                                 |         |    |                         |   |
|-----------------------------------------------------------------|---------|----|-------------------------|---|
| (Gracile burrowing skink)                                       |         |    |                         |   |
| <i>Kanakysaurus viviparous</i><br>(Species of lizard)           | Reptile | E  | 1 L                     | 2 |
| <i>Kanakysaurus zebratus</i><br>(Species of lizard)             | Reptile | E  | 1 L                     | 2 |
| <i>Lacertoides pardalis</i><br>(New Caledonian Leopard Skink)   | Reptile | V  | 1 L                     | 2 |
| <i>Lepidodactylus euaensis</i><br>(Eua Forest Gecko)            | Reptile | CE | 2 L                     |   |
| <i>Lepidodactylus manni</i><br>(Viti Forest Gecko)              | Reptile | V  | 19 H, 16 L, 15 M, 15 VL |   |
| <i>Lioscincus maruia</i><br>(Maruia Maquis Skink)               | Reptile | E  | 1 L                     | 2 |
| <i>Lioscincus steindachneri</i><br>(White-lipped Forest Skink)  | Reptile | E  | 1 L                     | 2 |
| <i>Lioscincus vivae</i><br>(Species of lizard)                  | Reptile | CE | 1 L                     | 2 |
| <i>Loveridgelaps elapoides</i><br>(Solomons Black-banded krait) | Reptile | V  | 13 H, 37 L, 17 M, 14 VL |   |
| <i>Marmorosphax boullinda</i><br>(Species of lizard)            | Reptile | V  | 1 L                     | 2 |
| <i>Marmorosphax kaala</i><br>(Species of lizard)                | Reptile | CE | 1 L                     | 2 |
| <i>Marmorosphax Montana</i><br>(Montane Marble-throated Skink)  | Reptile | V  | 1 L                     | 2 |
| <i>Marmorosphax taom</i><br>(Species of lizard)                 | Reptile | CE | 1 L                     | 2 |
| <i>Melomys matambuai</i><br>(Manus Melomys)                     | Mammal  | E  | 1 L                     | 3 |
| <i>Murexia rothschildi</i><br>(Broad-striped Dasyure)           | Mammal  | V  | 1 VL                    | 1 |
| <i>Nannoscincus exos</i><br>(Northern Dwarf Skink)              | Reptile | CE | 1 L                     | 2 |
| <i>Nannoscincus garrulous</i><br>(Species of snake)             | Reptile | E  | 1 L                     | 2 |
| <i>Nannoscincus gracilis</i><br>(Gracile Dwarf Skink)           | Reptile | V  | 1 L                     | 2 |

|                                                                             |         |    |                      |   |
|-----------------------------------------------------------------------------|---------|----|----------------------|---|
| <i>Nannoscincus greeri</i><br>(Greer's Dwarf Skink)                         | Reptile | E  | 1 L                  | 2 |
| <i>Nannoscincus hanchisteus</i><br>(Pindai Dwarf Skink)                     | Reptile | CE | 1 L                  | 2 |
| <i>Nannoscincus humectus</i><br>(Forêt Plate Dwarf Skink)                   | Reptile | E  | 1 L                  | 2 |
| <i>Nannoscincus manautei</i><br>(Species of lizard)                         | Reptile | CE | 1 L                  | 2 |
| <i>Nannoscincus mariei</i><br>(Earless Dwarf Skink)                         | Reptile | V  | 1 L, 1 VL            |   |
| <i>Nannoscincus rankini</i><br>(Rankin's Dwarf Skink)                       | Reptile | V  | 1 L                  | 2 |
| <i>Nannoscincus slevini</i><br>(Slevin's Dwarf Skink)                       | Reptile | E  | 1 L                  | 2 |
| <i>Nyctophilus nebulosus</i><br>(New Caledonia Long-eared Bat)              | Mammal  | CE | 1 L                  | 2 |
| <i>Oedodera marmorata</i><br>(Marbled Gecko)                                | Reptile | CE | 1 L                  | 2 |
| <i>Ogmodon vitianus</i><br>(Fiji Snake)                                     | Reptile | E  | 9 H, 9 M, 6 L, 1 VL  |   |
| <i>Peroryctes broadbenti</i><br>(Giant Bandicoot)                           | Mammal  | E  | 1 VL                 | 1 |
| <i>Phoboscincus bocourti</i><br>(Bocourt's Terrific Skink)                  | Reptile | E  | 1 L, 1 VL            |   |
| <i>Pogonomys fergussoniensis</i><br>(D'entrecasteaux Archipelago Pogonomys) | Mammal  | E  | 3 VL                 |   |
| <i>Pteropus anetianus</i><br>(Vanuatu Flying Fox)                           | Mammal  | V  | 3 L, 16 VL, 1 M      |   |
| <i>Pteropus cognatus</i><br>(Makira Flying Fox)                             | Mammal  | E  | 3 L, 1 VL, 1 M       |   |
| <i>Pteropus molossinus</i><br>(Pohnpei Flying Fox)                          | Mammal  | V  | 1 VL, 1 VH           |   |
| <i>Pteropus ornatus</i><br>(Ornate Flying Fox)                              | Mammal  | V  | 3 L, 1 VL            |   |
| <i>Pteropus rennelli</i><br>(Rennell Flying Fox)                            | Mammal  | V  | 1 L                  | 2 |
| <i>Pteropus vetulus</i><br>(New Caledonia Flying Fox)                       | Mammal  | V  | 1 L, 1 VL            |   |
| <i>Pteropus woodfordi</i>                                                   | Mammal  | V  | 5 L, 5 VL, 1 H, 1 VH |   |



|                                                                    |         |   |               |   |
|--------------------------------------------------------------------|---------|---|---------------|---|
| (Dwarf Flying Fox)                                                 |         |   |               |   |
| <i>Pteropus yapensis</i><br>(Yap flying fox)                       | Mammal  | V | 4 L           |   |
| <i>Rhacodactylus chahoua</i><br>(Bavay's Giant Gecko)              | Reptile | V | 3 L, 1 VL     |   |
| <i>Rhacodactylus ciliates</i><br>(Eyelash Gecko)                   | Reptile | V | 2 L, 2 VL     |   |
| <i>Rhacodactylus sarasinorum</i><br>(Sarasin's Giant Gecko)        | Reptile | V | 1 L           | 2 |
| <i>Rhacodactylus trachyrhynchus</i><br>(Rough-snouted Giant Gecko) | Reptile | E | 2 L, 1 VL     |   |
| <i>Sigaloseps ruficauda</i><br>(Red-tailed Shiny Skink)            | Reptile | V | 1 L           | 2 |
| <i>Simiscincus aurantiacus</i><br>(Orange-bellied Burrowing Skink) | Reptile | V | 1 L, 1 VL     |   |
| <i>Solomys sapientis</i><br>(Isabel Giant Rat)                     | Mammal  | E | 2 L, 1 M, 2 H |   |
| <i>Thylogale lanatus</i><br>(Mountain Pademelon)                   | Mammal  | E | 1 VL          | 1 |
| <i>Tropidoscincus aubrianus</i><br>(Aubrey's Whiptailed Skink)     | Reptile | V | 3 L, 1 VL     |   |
| <i>Uromys rex</i><br>(King Rat)                                    | Mammal  | E | 2 VL          |   |

\*1=0-0.1m, 2=0.1-0.2m, 3=0.2-0.3m, 4=0.3-0.4m.

† CE=Critically Endangered, E=Endangered, V=Vulnerable

**Supplementary Table 4. Number of islands in different categories under RCP 4.5 and RCP 8.5 projected Hs values (2081-2100).**

|              | <b>RCP 4.5 Projected Hs Values</b> |           |           |           |
|--------------|------------------------------------|-----------|-----------|-----------|
|              | 0-0.1 m                            | 0.1-0.2 m | 0.2-0.3 m | 0.3-0.4 m |
| C-Endangered | 22                                 | 78        | 0         | 0         |
| Endangered   | 160                                | 302       | 1         | 0         |
| Vulnerable   | 13                                 | 98        | 0         | 0         |
|              | <b>RCP 8.5 Projected Hs Values</b> |           |           |           |
| C-Endangered | 14                                 | 65        | 36        | 1         |
| Endangered   | 60                                 | 146       | 252       | 23        |
| Vulnerable   | 51                                 | 44        | 5         | 0         |

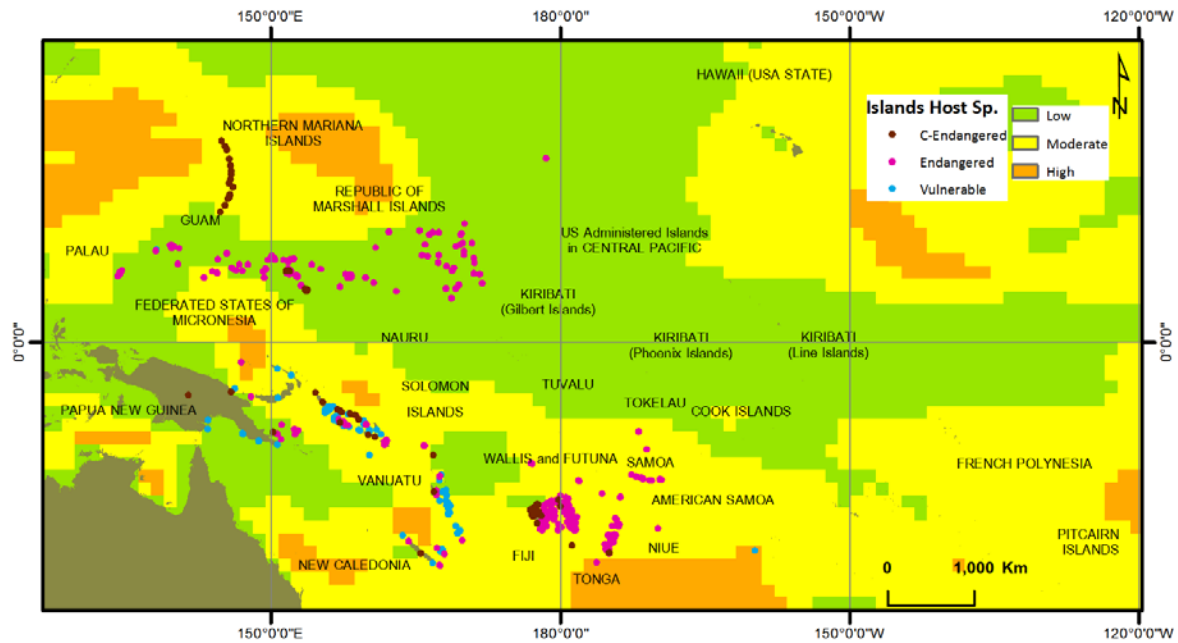

Figure S1 RCP 4.5 Projected Hs values for 2081-2100 reclassified into four categories. (Figure generated using ARCGIS 10.3, <http://www.esri.com/>). The concentration pathway RCP 4.5 (a medium low emission scenario) was used under the CMIP5 (Coupled Model Intercomparison Project Phase 5) model. The climate models used were CNRM-CM5, HadGEM2-ES, INMCM4 and ACCESS1.0.

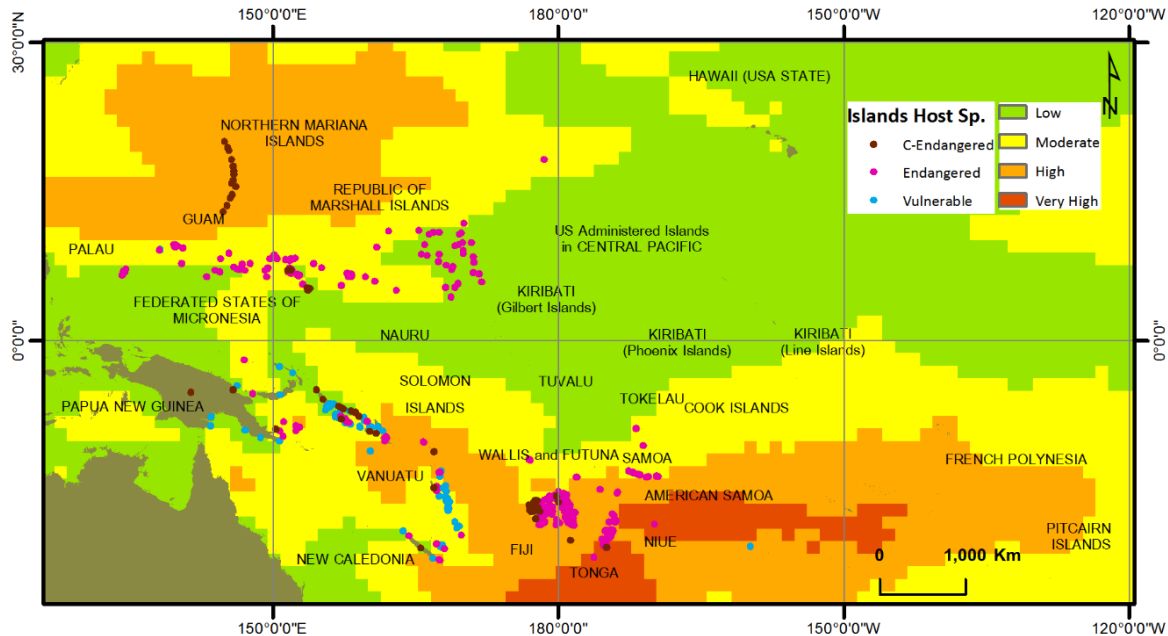

Figure S2. RCP 8.5 Projected Hs values for 2081-2100 reclassified into four categories. (Figure generated using ARCGIS 10.3, <http://www.esri.com/>). The concentration pathway RCP 8.5 (a high emission scenario) was used under the CMIP5 (Coupled Model Intercomparison Project Phase 5) model. The climate models used were CNRM-CM5, HadGEM2-ES, INMCM4 and ACCESS1.0.
